# Supplementary material
Source: HighWire-hosted journal article supplement (https://bmjopen.bmj.com/content/8/3/e015802)
Supplement: inline-supplementary-material-1 [file inline-supplementary-material-1.pdf]

## CDOP Identifier: CDR/

Child's age at death:

Date of review:

Gender:

### FORM C

*This proforma is used by the Child Death Overview Panel (CDOP) to:*

- *evaluate information about the child's death;*
- *identify lessons to be learnt; and*
- *to inform an understanding of all child deaths at a national level.*

*Where prior to the CDOP meeting, a local case discussion is held, the local team may complete a draft Form C to be forwarded to the CDOP to inform their deliberations.*

#### **Agencies represented at the meeting:**

Primary Health Care

Yes ☐ No ☐

Paediatrics

Yes ☐ No ☐

Hospital Services

Yes ☐ No ☐

Mental Health Services

Yes ☐ No ☐

Ambulance Services

Yes ☐ No ☐

Police

Yes ☐ No ☐

Children's Social Care Services

Yes ☐ No ☐

Schools

Yes ☐ No ☐

Other (Specify):

#### **List of documents available for discussion**

## CDOP Identifier: CDR/

Child's age at death:

Date of review:

Gender:

***Cause of death as presently understood:***

### **Case Summary**

A few paragraphs at most: a summary of the background and a factual description of events leading up to death. This should be as short as possible.

## CDOP Identifier: CDR/

Child's age at death:

Date of review:

Gender:

**The CDOP should analyse any relevant environmental, extrinsic, medical or personal factors that may have contributed to the child's death under the following headings.**

For each of the four domains below, determine different levels of influence (0-3) for any identified factors:

- 0 - Information not available
- 1 - No factors identified or factors identified but are unlikely to have contributed to the death
- 2 - Factors identified that may have contributed to vulnerability, ill-health or death
- 3 - Factors identified that provide a complete and sufficient explanation for the death

This information should inform the learning of lessons at a local level.

|                                                                                                                                                                                                                                                                       |                                                                                             |                            |
|-----------------------------------------------------------------------------------------------------------------------------------------------------------------------------------------------------------------------------------------------------------------------|---------------------------------------------------------------------------------------------|----------------------------|
| <b>Domain - Child's needs</b>                                                                                                                                                                                                                                         |                                                                                             |                            |
| <b>Factors intrinsic to the child</b><br>Include any known health needs; factors influencing health; development/ educational issues; behavioural issues; social relationships; identity and independence; abuse of drugs or alcohol; note strengths and difficulties |                                                                                             |                            |
| <b>Please enter relevant information</b>                                                                                                                                                                                                                              |                                                                                             |                            |
| <b>Please tick the following boxes if these factors were present or may have contributed to the death</b>                                                                                                                                                             |                                                                                             | <b>Relevance<br/>(0-3)</b> |
| <b>Condition:</b>                                                                                                                                                                                                                                                     |                                                                                             |                            |
| Acute / Sudden onset illness<br>Specify:                                                                                                                                                                                                                              | Yes / No / NK<br><input type="checkbox"/> <input type="checkbox"/> <input type="checkbox"/> |                            |
| <b>Chronic long term illness</b>                                                                                                                                                                                                                                      |                                                                                             |                            |
| Asthma                                                                                                                                                                                                                                                                | Yes / No / NK<br><input type="checkbox"/> <input type="checkbox"/> <input type="checkbox"/> |                            |
| Epilepsy                                                                                                                                                                                                                                                              | Yes / No / NK<br><input type="checkbox"/> <input type="checkbox"/> <input type="checkbox"/> |                            |
| Diabetes                                                                                                                                                                                                                                                              | Yes / No / NK<br><input type="checkbox"/> <input type="checkbox"/> <input type="checkbox"/> |                            |
| Other chronic illness<br>Specify:                                                                                                                                                                                                                                     | Yes / No / NK<br><input type="checkbox"/> <input type="checkbox"/> <input type="checkbox"/> |                            |
| <b>Disability or impairment</b>                                                                                                                                                                                                                                       |                                                                                             |                            |
| Learning disabilities<br>Specify:                                                                                                                                                                                                                                     | Yes / No / NK<br><input type="checkbox"/> <input type="checkbox"/> <input type="checkbox"/> |                            |
| Motor impairment<br>Specify:                                                                                                                                                                                                                                          | Yes / No / NK<br><input type="checkbox"/> <input type="checkbox"/> <input type="checkbox"/> |                            |
| Sensory impairment<br>Specify:                                                                                                                                                                                                                                        | Yes / No / NK<br><input type="checkbox"/> <input type="checkbox"/> <input type="checkbox"/> |                            |

## CDOP Identifier: CDR/

Child's age at death:

Date of review:

Gender:

|                                                                            |                                                                                             |  |
|----------------------------------------------------------------------------|---------------------------------------------------------------------------------------------|--|
| Other disability or impairment<br>Specify:                                 | Yes / No / NK<br><input type="checkbox"/> <input type="checkbox"/> <input type="checkbox"/> |  |
| Emotional / behavioural / mental health condition in the child<br>Specify: | Yes / No / NK<br><input type="checkbox"/> <input type="checkbox"/> <input type="checkbox"/> |  |
| Allergies<br>Specify:                                                      | Yes / No / NK<br><input type="checkbox"/> <input type="checkbox"/> <input type="checkbox"/> |  |
| Alcohol/substance misuse by the child<br>Specify:                          | Yes / No / NK<br><input type="checkbox"/> <input type="checkbox"/> <input type="checkbox"/> |  |

|                                                                                                                                                                                                                                                                                          |                                                                                             |                        |
|------------------------------------------------------------------------------------------------------------------------------------------------------------------------------------------------------------------------------------------------------------------------------------------|---------------------------------------------------------------------------------------------|------------------------|
| <b>Domain - family and environment</b>                                                                                                                                                                                                                                                   |                                                                                             |                        |
| <b>Factors in the family and environment</b><br>Include family structure and functioning; including parental abuse of drugs or alcohol; wider family relationships; housing; employment and income; social integration and support; community resources; note strengths and difficulties |                                                                                             |                        |
| <b>Please enter relevant information</b>                                                                                                                                                                                                                                                 |                                                                                             |                        |
| <b>Please tick the following boxes if these factors were present or may have contributed to the death</b><br><br><b>Condition:</b>                                                                                                                                                       |                                                                                             | <b>Relevance (0-3)</b> |
| Emotional/behavioural/mental health condition in a parent or carer<br>Specify:                                                                                                                                                                                                           | Yes / No / NK<br><input type="checkbox"/> <input type="checkbox"/> <input type="checkbox"/> |                        |
| Alcohol/substance misuse by a parent/carers<br>Specify                                                                                                                                                                                                                                   | Yes / No / NK<br><input type="checkbox"/> <input type="checkbox"/> <input type="checkbox"/> |                        |
| Smoking by the parent/carers in household<br>Specify:                                                                                                                                                                                                                                    | Yes / No / NK<br><input type="checkbox"/> <input type="checkbox"/> <input type="checkbox"/> |                        |
| Smoking by Mum during pregnancy<br>Specify:                                                                                                                                                                                                                                              | Yes / No / NK<br><input type="checkbox"/> <input type="checkbox"/> <input type="checkbox"/> |                        |
| Consanguinity<br>Specify:                                                                                                                                                                                                                                                                | Yes / No / NK<br><input type="checkbox"/> <input type="checkbox"/> <input type="checkbox"/> |                        |
| Housing<br>Specify:                                                                                                                                                                                                                                                                      | Yes / No / NK<br><input type="checkbox"/> <input type="checkbox"/> <input type="checkbox"/> |                        |
| Domestic violence<br>Specify:                                                                                                                                                                                                                                                            | Yes / No / NK<br><input type="checkbox"/> <input type="checkbox"/> <input type="checkbox"/> |                        |

## CDOP Identifier: CDR/

Child's age at death:

Date of review:

Gender:

|                                 |                                                                                             |  |
|---------------------------------|---------------------------------------------------------------------------------------------|--|
| Co-sleeping<br>Specify:         | Yes / No / NK<br><input type="checkbox"/> <input type="checkbox"/> <input type="checkbox"/> |  |
| Bullying<br>Specify:            | Yes / No / NK<br><input type="checkbox"/> <input type="checkbox"/> <input type="checkbox"/> |  |
| Gang/knife crime<br>Specify:    | Yes / No / NK<br><input type="checkbox"/> <input type="checkbox"/> <input type="checkbox"/> |  |
| Pets/animal assault<br>Specify: | Yes / No / NK<br><input type="checkbox"/> <input type="checkbox"/> <input type="checkbox"/> |  |

|                                                                                                                                                                                                                                                              |                                                                                             |                        |
|--------------------------------------------------------------------------------------------------------------------------------------------------------------------------------------------------------------------------------------------------------------|---------------------------------------------------------------------------------------------|------------------------|
| <b>Domain - parenting capacity</b>                                                                                                                                                                                                                           |                                                                                             |                        |
| <b>Factors in the parenting capacity</b><br>Include issues around provision of basic care; health care (including antenatal care where relevant); safety; emotional warmth; stimulation; guidance and boundaries; stability; note strengths and difficulties |                                                                                             |                        |
| <b>Please enter relevant information</b>                                                                                                                                                                                                                     |                                                                                             |                        |
| <b>Please tick the following boxes if these factors were present or may have contributed to the death</b>                                                                                                                                                    |                                                                                             | <b>Relevance (0-3)</b> |
| <b>Condition:</b>                                                                                                                                                                                                                                            |                                                                                             |                        |
| Poor parenting/supervision<br>Specify:                                                                                                                                                                                                                       | Yes / No / NK<br><input type="checkbox"/> <input type="checkbox"/> <input type="checkbox"/> |                        |
| Child abuse/neglect<br>Specify:                                                                                                                                                                                                                              | Yes / No / NK<br><input type="checkbox"/> <input type="checkbox"/> <input type="checkbox"/> |                        |

|                                                                                                                                                                                                                                                  |                                                                                             |                        |
|--------------------------------------------------------------------------------------------------------------------------------------------------------------------------------------------------------------------------------------------------|---------------------------------------------------------------------------------------------|------------------------|
| <b>Domain - service provision</b>                                                                                                                                                                                                                |                                                                                             |                        |
| <b>Factors in relation to service provision</b><br>Include any identified services (either required or provided); any gaps between child's or family member's needs and service provision; any issues in relation to service provision or uptake |                                                                                             |                        |
| <b>Please enter relevant information</b>                                                                                                                                                                                                         |                                                                                             |                        |
| <b>Please tick the following boxes if these factors were present or may have contributed to the death</b>                                                                                                                                        |                                                                                             | <b>Relevance (0-3)</b> |
| <b>Condition:</b>                                                                                                                                                                                                                                |                                                                                             |                        |
| Access to health care<br>Specify:                                                                                                                                                                                                                | Yes / No / NK<br><input type="checkbox"/> <input type="checkbox"/> <input type="checkbox"/> |                        |

## CDOP Identifier: CDR/

Child's age at death:

Date of review:

Gender:

|                                         |                                                                                             |  |
|-----------------------------------------|---------------------------------------------------------------------------------------------|--|
| Prior medical intervention<br>Specify:  | Yes / No / NK<br><input type="checkbox"/> <input type="checkbox"/> <input type="checkbox"/> |  |
| Prior surgical intervention<br>Specify: | Yes / No / NK<br><input type="checkbox"/> <input type="checkbox"/> <input type="checkbox"/> |  |

## CDOP Identifier: CDR/

Child's age at death:

Date of review:

Gender:

**The CDOP should categorise the likely/cause of death using the following schema.**

This classification is hierarchical: where more than one category could reasonably be applied, the highest up the list should be marked.

| Category | Name & description of category                                                                                                                                                                                                                                                                                                                                                                                 | Tick box below           |
|----------|----------------------------------------------------------------------------------------------------------------------------------------------------------------------------------------------------------------------------------------------------------------------------------------------------------------------------------------------------------------------------------------------------------------|--------------------------|
| 1        | <b>Deliberately inflicted injury, abuse or neglect</b><br>This includes suffocation, shaking injury, knifing, shooting, poisoning & other means of probable or definite homicide; also deaths from war, terrorism or other mass violence; includes severe neglect leading to death.                                                                                                                            | <input type="checkbox"/> |
| 2        | <b>Suicide or deliberate self-inflicted harm</b><br>This includes hanging, shooting, self-poisoning with paracetamol, death by self-asphyxia, from solvent inhalation, alcohol or drug abuse, or other form of self-harm. It will usually apply to adolescents rather than younger children.                                                                                                                   | <input type="checkbox"/> |
| 3        | <b>Trauma and other external factors</b><br>This includes isolated head injury, other or multiple trauma, burn injury, drowning, unintentional self-poisoning in pre-school children, anaphylaxis & other extrinsic factors.<br><b>Excludes</b> Deliberately inflicted injury, abuse or neglect. (category 1).                                                                                                 | <input type="checkbox"/> |
| 4        | <b>Malignancy</b><br>Solid tumours, leukaemias & lymphomas, and malignant proliferative conditions such as histiocytosis, even if the final event leading to death was infection, haemorrhage etc.                                                                                                                                                                                                             | <input type="checkbox"/> |
| 5        | <b>Acute medical or surgical condition</b><br>For example, Kawasaki disease, acute nephritis, intestinal volvulus, diabetic ketoacidosis, acute asthma, intussusception, appendicitis; sudden unexpected deaths with epilepsy.                                                                                                                                                                                 | <input type="checkbox"/> |
| 6        | <b>Chronic medical condition</b><br>For example, Crohn's disease, liver disease, immune deficiencies, even if the final event leading to death was infection, haemorrhage etc. <b>Includes</b> cerebral palsy with clear post-perinatal cause.                                                                                                                                                                 | <input type="checkbox"/> |
| 7        | <b>Chromosomal, genetic and congenital anomalies</b><br>Trisomies, other chromosomal disorders, single gene defects, neurodegenerative disease, cystic fibrosis, and other congenital anomalies including cardiac.                                                                                                                                                                                             | <input type="checkbox"/> |
| 8        | <b>Perinatal/neonatal event</b><br>Death ultimately related to perinatal events, eg sequelae of prematurity, antepartum and intrapartum anoxia, bronchopulmonary dysplasia, post-haemorrhagic hydrocephalus, irrespective of age at death. It <b>includes</b> cerebral palsy without evidence of cause, and <b>includes</b> congenital or early-onset bacterial infection (onset in the first postnatal week). | <input type="checkbox"/> |
| 9        | <b>Infection</b><br>Any primary infection (ie, not a complication of one of the above categories), arising after the first postnatal week, or after discharge of a preterm baby. This would include septicaemia, pneumonia, meningitis, HIV infection etc.                                                                                                                                                     | <input type="checkbox"/> |
| 10       | <b>Sudden unexpected, unexplained death</b><br>Where the pathological diagnosis is either 'SIDS' or 'unascertained', at any age. <b>Excludes</b> Sudden Unexpected Death in Epilepsy (category 5).                                                                                                                                                                                                             | <input type="checkbox"/> |

## CDOP Identifier: CDR/

Child's age at death:

Date of review:

Gender:

**The panel should categorise the 'preventability' of the death – tick one box.**

Preventable child deaths are defined in paragraphs 7.23 and 7.24 of *Working Together to Safeguard Children*

|                                         |                                                                                                                                                                                                                                                       |                          |
|-----------------------------------------|-------------------------------------------------------------------------------------------------------------------------------------------------------------------------------------------------------------------------------------------------------|--------------------------|
| <b>Modifiable factors identified</b>    | The panel have identified one or more factors, in any domain, which may have contributed to the death of the child and which, by means of locally or nationally achievable interventions, could be modified to reduce the risk of future child deaths | <input type="checkbox"/> |
| <b>No Modifiable factors identified</b> | The panel have not identified any potentially modifiable factors in relation to this death                                                                                                                                                            | <input type="checkbox"/> |
|                                         | Inadequate information upon which to make a judgement.<br><i>NB this category should be used very rarely indeed.</i>                                                                                                                                  | <input type="checkbox"/> |

### Issues identified in the review

List the issues identified by the review group. This list may include the absence of certain key persons from the discussion or the lack of key documents.

### Learning Points

List the learning points that emerge. These may well overlap with the issues and with recommendations.



## CDOP Identifier: CDR/

Child's age at death:

Date of review:

Gender:

### Recommendations

List any recommendations, even if already picked up as learning points or 'issues'

### Follow up plans for the family, where relevant

### Possible Actions

Should this death be referred to another agency or Authority (e.g. Police, Coroner, Health and Safety Executive, Serious Case Review panel) for further investigation or enquiry? If so, please state

☐

Yes

☐

No

☐

Already done

If yes please specify;
